# Supplementary material for: A highly efficient extraction, separation and detection method for pyrethroids in pork using the interaction between pyrethroids and protein
Source: Royal Society of Chemistry journal article supplement (doi:10.1039/c3ay40258d), 2013-11-20
Supplement: c3ay40258d.pdf [file c3ay40258d.pdf]

**A high efficient extraction, separation, and detection method for  
pyrethroids in pork based on the investigation of interaction between  
pyrethroids and protein**

Zhenbo Liu, Fengyan Jia, Wenwen Wang, Yongming Liu, and Jungang Yin\*

*College of Chemistry and Chemical Engineering, Yantai University, Yantai 264005, China*

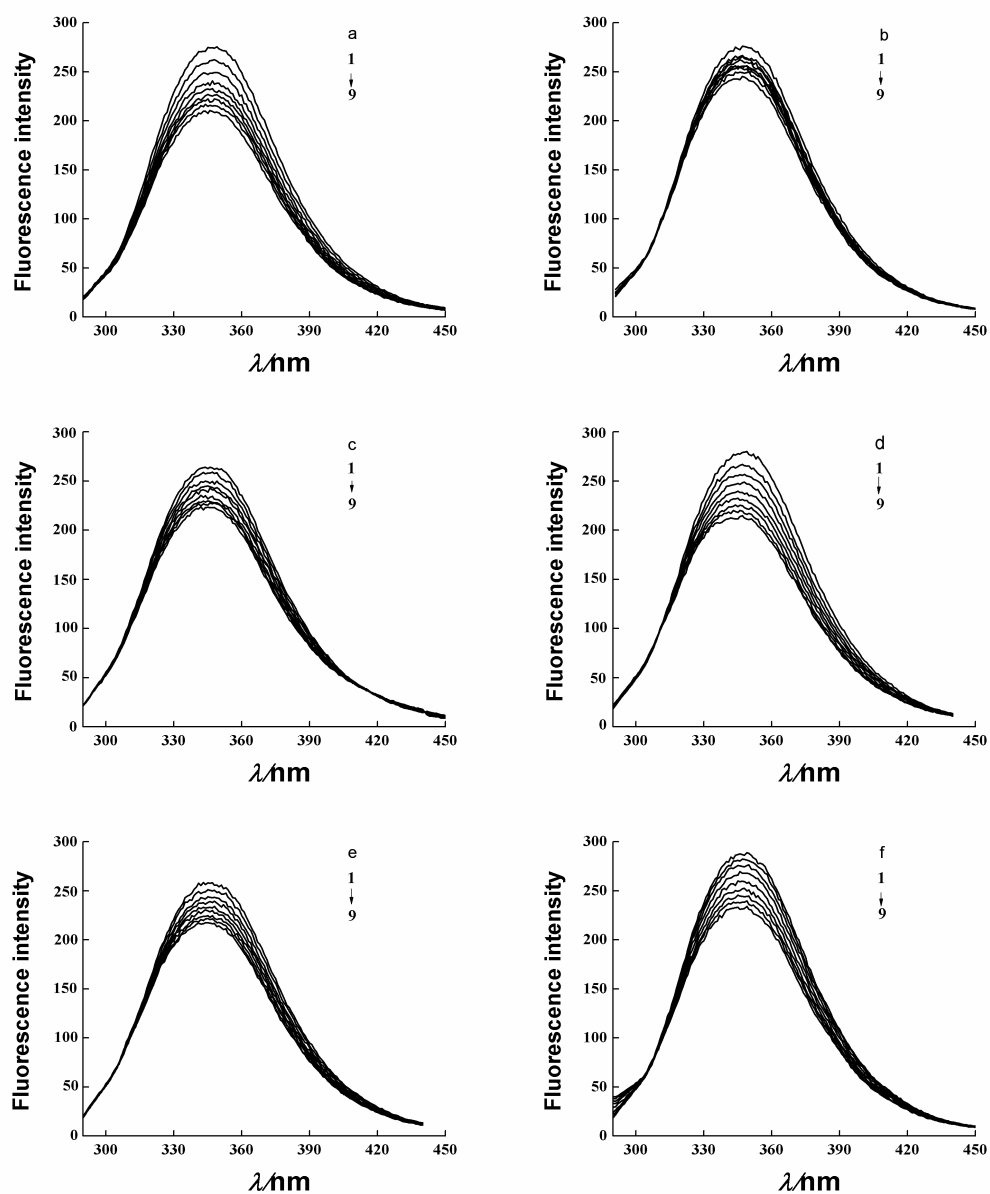

**Figure S1** The quenching fluorescence spectra of BSA with pyrethroid pesticides at 298

K;  $\lambda_{\text{ex}} = 280 \text{ nm}$ ;  $c_{\text{BSA}} = 1.0 \times 10^{-6} \text{ mol L}^{-1}$ ;

- $10^6 c_{\text{tetramethrin}}$ , 1→9: 0.00, 3.33, 6.67, 10.00, 13.33, 16.67, 20.00, 23.33, 26.67 mol L<sup>-1</sup>.
- $10^6 c_{\text{Fenpropathrin}}$ , 1→9: 0.00, 3.33, 6.67, 10.00, 13.33, 16.67, 20.00, 23.33, 26.67 mol L<sup>-1</sup>.
- $10^6 c_{\text{Cyhalothrin}}$ , 1→9: 0.00, 3.33, 6.67, 10.00, 13.33, 16.67, 20.00, 23.33, 26.67 mol L<sup>-1</sup>.
- $10^6 c_{\text{Cypermethrin}}$ , 1→9: 0.00, 3.33, 6.67, 10.00, 13.33, 16.67, 20.00, 23.33, 26.67 mol L<sup>-1</sup>.

- e.  $10^6 c_{\text{Fenvalerate}}$ , 1→9: 0.00, 3.33, 6.67, 10.00, 13.33, 16.67, 20.00, 23.33, 26.67 mol L<sup>-1</sup>.
- f.  $10^6 c_{\text{Deltamethrin}}$ , 1→9: 0.00, 3.33, 6.67, 10.00, 13.33, 16.67, 20.00, 23.33, 26.67 mol L<sup>-1</sup>.

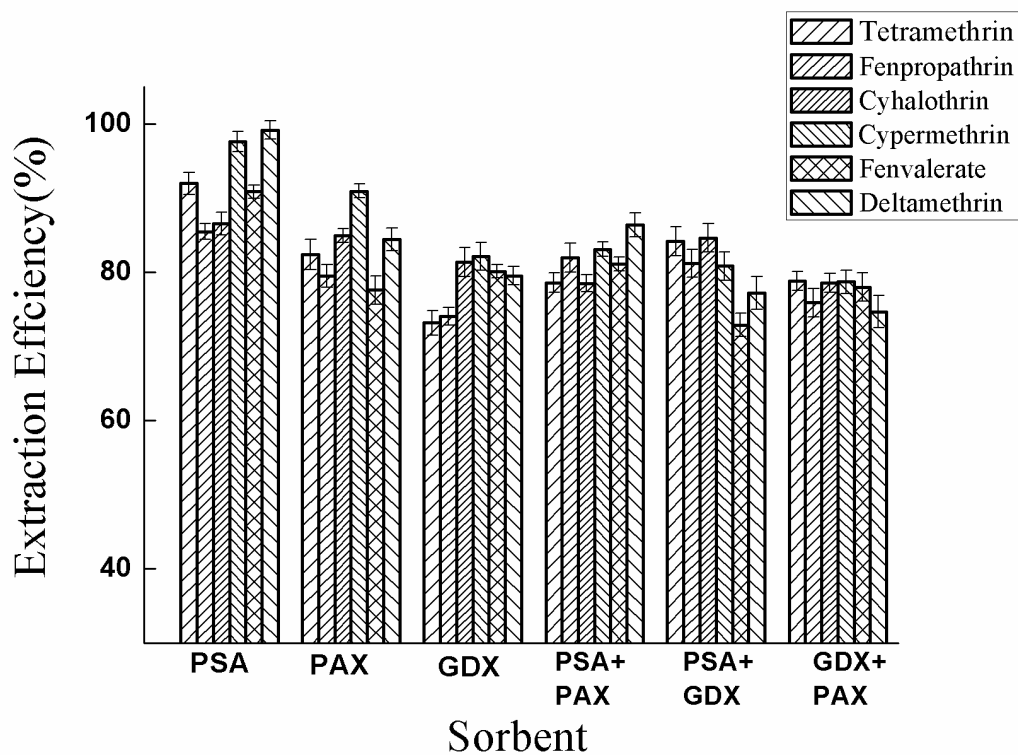

**Figure S2** Effect of sorbent on the extraction efficiencies of pyrethroid pesticides.
